# Supplementary material for: Characterization of the Oncogenic Potential of Eukaryotic Initiation Factor 4A1 in Lung Adenocarcinoma via Cell Cycle Regulation and Immune Microenvironment Reprogramming
Source: MDPI journal article supplement (doi:10.3390/biology11070975), 2022-06-28
Supplement: s1 [file s1]

Table S1. The gene lists of positive correlation with EIF4A1

| Gene    | r    | Gene    | r    | Gene    | r    | Gene      | r    |
|---------|------|---------|------|---------|------|-----------|------|
| EIF5AL1 | 0.75 | WRAP53  | 0.46 | RPL7L1  | 0.43 | NOL10     | 0.41 |
| TSR1    | 0.71 | GSG2    | 0.46 | PAK1IP1 | 0.43 | FARSB     | 0.41 |
| C1QBP   | 0.69 | PA2G4   | 0.46 | PPIL1   | 0.42 | PWP1      | 0.41 |
| SCO1    | 0.66 | CSE1L   | 0.45 | DBF4    | 0.42 | CDC25A    | 0.41 |
| EIF5A   | 0.66 | URB2    | 0.45 | PPAT    | 0.42 | C11orf82  | 0.41 |
| SEN3    | 0.66 | RPP40   | 0.45 | ATIC    | 0.42 | UHRF1     | 0.41 |
| YWHAE   | 0.62 | EEF1E1  | 0.45 | XPO5    | 0.42 | C10orf119 | 0.41 |
| NUP88   | 0.61 | FAM64A  | 0.45 | DDX18   | 0.42 | THOC4     | 0.41 |
| PHF23   | 0.6  | CDCA5   | 0.45 | CCNA2   | 0.42 | UNG       | 0.4  |
| ELAC2   | 0.55 | MRPL44  | 0.45 | CHEK1   | 0.42 | DNAJC9    | 0.4  |
| AURKB   | 0.54 | HSPD1   | 0.45 | PRPF40A | 0.42 | RRM2      | 0.4  |
| COX10   | 0.54 | EIF3J   | 0.44 | NCAPD2  | 0.42 | EIF2S2    | 0.4  |
| FXR2    | 0.54 | NOL7    | 0.44 | NUDCD1  | 0.42 | KPNA2     | 0.4  |
| DHX33   | 0.54 | TMEM93  | 0.44 | NDUFS1  | 0.42 | GEMIN4    | 0.4  |
| PFN1    | 0.53 | SRPK1   | 0.44 | CENPH   | 0.42 | NUP153    | 0.4  |
| COPS3   | 0.53 | CCT4    | 0.44 | CENPO   | 0.42 | ZNF286A   | 0.4  |
| UBE2G1  | 0.53 | MCM4    | 0.44 | MCM10   | 0.42 | DTL       | 0.4  |
| WDR43   | 0.52 | ABCE1   | 0.44 | NOP56   | 0.42 | NUDT15    | 0.4  |
| PSMB6   | 0.51 | SSRP1   | 0.44 | PLK1    | 0.42 | GRPEL1    | 0.4  |
| MYBBP1A | 0.5  | MAD2L1  | 0.44 | BUB1B   | 0.42 | PRPF8     | 0.4  |
| CCNB1   | 0.5  | PELP1   | 0.44 | PUS7    | 0.41 | WDR75     | 0.4  |
| DDX21   | 0.49 | MRPL19  | 0.44 | CDKN3   | 0.41 | PRKDC     | 0.4  |
| LYAR    | 0.49 | PRR11   | 0.44 | DSCC1   | 0.41 | CENPE     | 0.4  |
| DARS2   | 0.49 | NLE1    | 0.44 | TEX10   | 0.41 | UTP18     | 0.4  |
| WDR12   | 0.49 | PGAM5   | 0.44 | STRAP   | 0.41 | SLC25A11  | 0.4  |
| CCT7    | 0.48 | OLA1    | 0.44 | GABPB1  | 0.41 | DDX10     | 0.4  |
| TIMM22  | 0.48 | C10orf2 | 0.44 | BCCIP   | 0.41 | MRPL42    | 0.4  |
| PAICS   | 0.48 | SNRPD1  | 0.44 | CRK     | 0.41 | MTHFD2    | 0.4  |
| MAP2K4  | 0.48 | NCL     | 0.43 | HMGA1   | 0.41 | CCDC86    | 0.4  |
| RIOK1   | 0.48 | GLOD4   | 0.43 | GNL3    | 0.41 | NCAPH     | 0.4  |
| BUB3    | 0.48 | PFAS    | 0.43 | NOP58   | 0.41 | DCAF13    | 0.4  |
| DVL2    | 0.48 | NCAPG   | 0.43 | LRPPRC  | 0.41 | AHCY      | 0.4  |
| RNMTL1  | 0.48 | MIS12   | 0.43 | NLN     | 0.41 | HNRNPC    | 0.4  |
| NOP14   | 0.48 | RPL26   | 0.43 | RABEP1  | 0.41 | PNO1      | 0.4  |
| RAN     | 0.47 | YWHAQ   | 0.43 | CCT8    | 0.41 | VDAC2     | 0.4  |
| RPA1    | 0.47 | NUP37   | 0.43 | FOXN1   | 0.41 | ACLY      | 0.4  |
| NOLC1   | 0.47 | MPDU1   | 0.43 | DKC1    | 0.41 | KPNB1     | 0.4  |
| CCT3    | 0.46 | OVCA2   | 0.43 | UCHL5   | 0.41 | NOL11     | 0.4  |
| MKI67IP | 0.46 | DENR    | 0.43 | DARS    | 0.41 | STIP1     | 0.4  |
| DULLARD | 0.46 | EIF2S1  | 0.43 | XRCC5   | 0.41 | CCT5      | 0.4  |

Table S2. The gene lists of negative correlation with EIF4A1

| Gene     | r     | Gene      | r     | Gene     | r     | Gene       | r    |
|----------|-------|-----------|-------|----------|-------|------------|------|
| CCDC159  | -0.38 | UBA7      | -0.32 | ABCC6    | -0.31 | RPS6KA1    | -0.3 |
| LMF1     | -0.37 | FAAH      | -0.32 | HLA-DOB  | -0.31 | C5orf45    | -0.3 |
| CBX7     | -0.36 | CTSH      | -0.32 | PIGQ     | -0.31 | AGXT2L2    | -0.3 |
| TNFRSF14 | -0.35 | CD74      | -0.32 | SFI1     | -0.31 | TUBGCP6    | -0.3 |
| ZMAT1    | -0.34 | C1orf63   | -0.32 | HLA-DPB1 | -0.31 | FAM193B    | -0.3 |
| HLA-DMA  | -0.34 | FBXO44    | -0.32 | HLA-DRB1 | -0.31 | KLHDC1     | -0.3 |
| ECHDC2   | -0.34 | KLHDC7A   | -0.32 | LDLRAP1  | -0.31 | DAPK2      | -0.3 |
| PIK3IP1  | -0.34 | FUCA1     | -0.32 | CCDC88B  | -0.31 | CHKB-CPT1B | -0.3 |
| C21orf2  | -0.33 | GGT3P     | -0.31 | GNPTG    | -0.31 | LOC115110  | -0.3 |
| ZNF688   | -0.33 | TMEM125   | -0.31 | NAPSB    | -0.3  | TTLL3      | -0.3 |
| SEPW1    | -0.32 | TMEM219   | -0.31 | FMO4     | -0.3  |            |      |
| CCDC159  | -0.38 | C17orf108 | -0.31 | POU6F1   | -0.3  |            |      |
